# Supplementary material for: Perioperatives Anämiemanagement – Systematischer Review und Meta-Analyse
Source: Springer Nature journal article supplement (doi:10.1007/s10354-014-0293-x), 2014-08-01
Supplement: MOESM1 [file 14928546]

**Appendix A: Suchstrategie**

Die erste Datenbankabfrage erfolgte am 10. September 2012. In den Tabellen 1-5 findet sich die detaillierte Suchstrategie. In der PubMed-Suche wurden 473 Titel gefunden, in der Cochrane Library 378, im Web of Science 208, in CINAHL 27 und in EMBASE 432; vor dem Löschen der Duplikate. Im Anhang findet sich die Update-Suche: Der Suchzeitraum wurde von Jänner 1994 bis April 2014 erweitert.

**Tabelle 1: Suchstrategie PubMed**

| **Search** | **Query** | **Items found** |
| --- | --- | --- |
| [#1](http://www.ncbi.nlm.nih.gov/pubmed/advanced) | Search **"Anemia"[Mesh] OR “Anemia”[tiab]** | [158108](http://www.ncbi.nlm.nih.gov/pubmed/?cmd=HistorySearch&querykey=1) |
| [#2](http://www.ncbi.nlm.nih.gov/pubmed/advanced) | Search **"Vitamin B 12"[Mesh] OR "Folic Acid"[Mesh] OR "Iron"[Mesh] OR "Erythropoietin"[Mesh] OR "Blood Transfusion"[Mesh]** | [199780](http://www.ncbi.nlm.nih.gov/pubmed/?cmd=HistorySearch&querykey=2) |
| [#3](http://www.ncbi.nlm.nih.gov/pubmed/advanced) | Search **"Perioperative Period"[Mesh] OR "Perioperative Care"[Mesh] OR “perioperative”[tiab]** | [191611](http://www.ncbi.nlm.nih.gov/pubmed/?cmd=HistorySearch&querykey=3) |
| [#4](http://www.ncbi.nlm.nih.gov/pubmed/advanced) | Search **#1 AND #2 AND #3** | [641](http://www.ncbi.nlm.nih.gov/pubmed/?cmd=HistorySearch&querykey=4) |
| [#5](http://www.ncbi.nlm.nih.gov/pubmed/advanced) | Search **"Neoplasms"[Mesh] OR “Cancer”[tiab] OR "Infection"[Mesh]** | [3088056](http://www.ncbi.nlm.nih.gov/pubmed/?cmd=HistorySearch&querykey=5) |
| [#6](http://www.ncbi.nlm.nih.gov/pubmed/advanced) | Search **#1 AND #2 AND #5** | [3997](http://www.ncbi.nlm.nih.gov/pubmed/?cmd=HistorySearch&querykey=6) |
| [#7](http://www.ncbi.nlm.nih.gov/pubmed/advanced) | Search **#4 OR #6** | [4509](http://www.ncbi.nlm.nih.gov/pubmed/?cmd=HistorySearch&querykey=7) |
| [#8](http://www.ncbi.nlm.nih.gov/pubmed/advanced) | Search **"Humans"[Mesh]** | [12336216](http://www.ncbi.nlm.nih.gov/pubmed/?cmd=HistorySearch&querykey=8) |
| [#9](http://www.ncbi.nlm.nih.gov/pubmed/advanced) | Search **#7 AND #8** | [4170](http://www.ncbi.nlm.nih.gov/pubmed/?cmd=HistorySearch&querykey=9) |
| [#10](http://www.ncbi.nlm.nih.gov/pubmed/advanced) | Search **(("Meta-Analysis" [Publication Type] OR "Meta-Analysis as Topic"[Mesh] OR "Meta-Analysis"[tiab] OR "systematic review") OR "Cohort Studies"[Mesh]) OR "Randomized Controlled Trial"[Publication Type] OR "Randomized Controlled Trials as Topic"[MeSH]) OR "Single-Blind Method"[MeSH] OR "Double-Blind Method"[MeSH] OR "Random Allocation"[MeSH]** | [1625478](http://www.ncbi.nlm.nih.gov/pubmed/?cmd=HistorySearch&querykey=10) |
| [#11](http://www.ncbi.nlm.nih.gov/pubmed/advanced) | Search **#9 AND #10** | [931](http://www.ncbi.nlm.nih.gov/pubmed/?cmd=HistorySearch&querykey=11) |
| [#12](http://www.ncbi.nlm.nih.gov/pubmed/advanced) | Search **("Adult"[Mesh]) AND #11** | [654](http://www.ncbi.nlm.nih.gov/pubmed/?cmd=HistorySearch&querykey=12) |
| [#13](http://www.ncbi.nlm.nih.gov/pubmed/advanced) | Search **(#12) AND ("2002/01/01"[Date - Entrez] : "3000"[Date - Entrez])** | [473](http://www.ncbi.nlm.nih.gov/pubmed/?cmd=HistorySearch&querykey=13) |

**Tabelle 2: Suchstrategie Cochrane**

| **ID** | **Search** | **Hits** |
| --- | --- | --- |
| #1 | [Anemia](http://onlinelibrary.wiley.com/o/cochrane/searchHistory?mode=runquery&qnum=1) | 6507 |
| #2 | Vitamin B 12 or Folic Acid or Iron or Erythropoietin or Blood Transfusion | 14691 |
| #3 | [Perioperative](http://onlinelibrary.wiley.com/o/cochrane/searchHistory?mode=runquery&qnum=3) | 6098 |
| #4 | MeSH descriptor: [Perioperative Care] explode all trees | 9272 |
| #5 | [MeSH descriptor: [Perioperative Period] explode all trees](http://onlinelibrary.wiley.com/o/cochrane/searchHistory?mode=runquery&qnum=5) | 4966 |
| #6 | #1 and #2 and (#3 or #4 or #5) | 98 |
| #7 | [cancer](http://onlinelibrary.wiley.com/o/cochrane/searchHistory?mode=runquery&qnum=7) | 66462 |
| #8 | [infection](http://onlinelibrary.wiley.com/o/cochrane/searchHistory?mode=runquery&qnum=8) | 47514 |
| #9 | #1 and #2 and (#7 or #8) | 1005 |
| #10 | [#6 or #9](http://onlinelibrary.wiley.com/o/cochrane/searchHistory?mode=runquery&qnum=10) | 1047 |
| #11 | human | 492793 |
| #12 | adult or adults | 290008 |
| #13 | #10 and #11 and #12 | 378 |

**Tabelle 3: Suchstrategie Web of Science**

| **Set** | **Results** | **Search** |
| --- | --- | --- |
| # 11 | [208](http://apps.webofknowledge.com.libproxy.lib.unc.edu/summary.do?product=UA&doc=1&qid=12&SID=2DmA91aealcNlhcA6id&search_mode=CombineSearches) | #10 AND #9  Timespan=All Years  Search language=English   Lemmatization=On |
| # 10 | [Approximately  1,211,958](http://apps.webofknowledge.com.libproxy.lib.unc.edu/summary.do?product=UA&doc=1&qid=11&SID=2DmA91aealcNlhcA6id&search_mode=GeneralSearch) | Topic=(meta-analysis) OR Topic=(systematic review) OR Topic=(cohort study) OR Topic=(randomized controlled trial)  Timespan=All Years  Search language=English   Lemmatization=On |
| # 9 | [1,205](http://apps.webofknowledge.com.libproxy.lib.unc.edu/summary.do?product=UA&doc=1&qid=10&SID=2DmA91aealcNlhcA6id&search_mode=CombineSearches) | #8 OR #7  Timespan=2002-2012  Search language=English   Lemmatization=On |
| # 8 | [Approximately  105](http://apps.webofknowledge.com.libproxy.lib.unc.edu/summary.do?product=UA&doc=1&qid=9&SID=2DmA91aealcNlhcA6id&search_mode=CombineSearches) | #6 AND #3  Timespan=2002-2012  Search language=English   Lemmatization=On |
| # 7 | [Approximately  1,444](http://apps.webofknowledge.com.libproxy.lib.unc.edu/summary.do?product=UA&doc=1&qid=8&SID=2DmA91aealcNlhcA6id&search_mode=CombineSearches) | #6 AND #5  Timespan=2002-2012  Search language=English   Lemmatization=On |
| # 6 | [Approximately  440,942](http://apps.webofknowledge.com.libproxy.lib.unc.edu/summary.do?product=UA&doc=1&qid=7&SID=2DmA91aealcNlhcA6id&search_mode=GeneralSearch) | Topic=(Blood Transfusion) OR Topic=(Erythropoietin) OR Topic=(iron) OR Topic=(folic acid) OR Topic=(vitamin b 12)  Timespan=2002-2012  Search language=English   Lemmatization=On |
| # 5 | [Approximately  6,391](http://apps.webofknowledge.com.libproxy.lib.unc.edu/summary.do?product=UA&doc=1&qid=6&SID=2DmA91aealcNlhcA6id&search_mode=Refine) | Topic=(anemia) AND Topic=(cancer OR infection) AND Topic=(adult*) AND Topic=(human*)  Refined by: Document Types=( ARTICLE OR CLINICAL TRIAL OR REVIEW )  Timespan=2002-2012 |
| # 4 | [Approximately  7,570](http://apps.webofknowledge.com.libproxy.lib.unc.edu/summary.do?product=UA&doc=1&qid=5&SID=2DmA91aealcNlhcA6id&search_mode=GeneralSearch) | Topic=(anemia) AND Topic=(cancer OR infection) AND Topic=(adult*) AND Topic=(human*)  Timespan=2002-2012  Search language=English   Lemmatization=On |
| # 3 | [143](http://apps.webofknowledge.com.libproxy.lib.unc.edu/summary.do?product=UA&doc=1&qid=3&SID=2DmA91aealcNlhcA6id&search_mode=Refine) | Topic=(anemia) AND Topic=(perioperative) AND Topic=(human*) AND Topic=(adult*)  Refined by: Document Types=( ARTICLE OR CLINICAL TRIAL OR REVIEW )  Timespan=2002-2012 |
| # 2 | [152](http://apps.webofknowledge.com.libproxy.lib.unc.edu/summary.do?product=UA&doc=1&qid=2&SID=2DmA91aealcNlhcA6id&search_mode=GeneralSearch) | Topic=(anemia) AND Topic=(perioperative) AND Topic=(human*) AND Topic=(adult*)  Timespan=2002-2012  Search language=English   Lemmatization=On |
| # 1 | [940](http://apps.webofknowledge.com.libproxy.lib.unc.edu/summary.do?product=UA&doc=1&qid=1&SID=2DmA91aealcNlhcA6id&search_mode=GeneralSearch) | Topic=(anemia) AND Topic=(perioperative)  Timespan=All Years  Search language=English   Lemmatization=On |

**Tabelle 4: Suchstrategie CINAHL**

Formularbeginn

| **#** | **Query** | **Results** |
| --- | --- | --- |
| S17 | S14 and S15 and S16 | 27 |
| S16 | (MH "Human") | 708439 |
| S15 | (MH "Adult") | 381165 |
| S14 | S9 or S13 | 292 |
| S13 | S1 and S8 and S12 | 229 |
| S12 | S10 or S11 | 32879 |
| S11 | (MH "Infection") | 5488 |
| S10 | (MH "Neoplasms") | 27610 |
| S9 | S1 and S2 and S8 | 68 |
| S8 | S3 or S4 or S5 or S6 or S7 | 12508 |
| S7 | (MH "Blood Transfusion") | 4743 |
| S6 | (MH "Erythropoietin") | 2042 |
| S5 | (MH "Iron") | 2559 |
| S4 | (MH "Folic Acid") | 3171 |
| S3 | (MH "Vitamin B12") | 1443 |
| S2 | (MH "Perioperative Care+") OR "perioperative" | 34386 |
| S1 | (MH "Anemia+") | 8711 |

**Tabelle 5: Suchstrategie EMBASE**

Formularbeginn

| **No.** | **Query** | **Results** |
| --- | --- | --- |
| #2 | 'anemia'/exp AND 'perioperative period'/exp AND ('cyanocobalamin'/exp OR 'folic acid'/exp OR 'iron'/exp OR 'erythropoietin'/exp OR 'blood transfusion'/exp) AND 'adult'/exp AND 'human'/exp | **82** |
| #3 | 'anemia'/exp AND ('cyanocobalamin'/exp OR 'folic acid'/exp OR 'iron'/exp OR 'erythropoietin'/exp OR 'blood transfusion'/exp) AND ('neoplasm'/exp OR 'infection'/exp) AND 'adult'/exp AND 'human'/exp | **4,590** |
|  |  |  |
| #4 | #2 OR #3 | **4,639** |
| #5 | #4 AND ('clinical article'/de OR 'clinical trial'/de OR 'cohort analysis'/de OR 'comparative study'/de OR 'controlled clinical trial'/de OR 'controlled study'/de OR 'double blind procedure'/de OR 'human'/de OR 'major clinical study'/de OR 'multicenter study'/de OR 'phase 1 clinical trial'/de OR 'phase 2 clinical trial'/de OR 'phase 3 clinical trial'/de OR 'randomized controlled trial'/de) AND (2002:py OR 2003:py OR 2004:py OR 2005:py OR 2006:py OR 2007:py OR 2008:py OR 2009:py OR 2010:py OR 2011:py OR 2012:py) AND ('article'/it OR 'review'/it) | **3,087** |
| #6 | 'anemia'/mj | **33,490** |
| #7 | #5 AND #6 | **432** |

**Update-Suche April 2014**

Pubmed 16.04.2014

| Search | Query | Items found |
| --- | --- | --- |
| [#1](http://www.ncbi.nlm.nih.gov/pubmed/advanced) | Search ("Anemia"[Mesh] OR “Anemia”[tiab]) | [167325](http://www.ncbi.nlm.nih.gov/pubmed/?cmd=HistorySearch&querykey=1) |
| [#2](http://www.ncbi.nlm.nih.gov/pubmed/advanced) | Search ("Vitamin B 12"[Mesh] OR "Folic Acid"[Mesh] OR "Iron"[Mesh] OR "Erythropoietin"[Mesh] OR "Blood Transfusion"[Mesh]) | [210033](http://www.ncbi.nlm.nih.gov/pubmed/?cmd=HistorySearch&querykey=2) |
| [#3](http://www.ncbi.nlm.nih.gov/pubmed/advanced) | Search ("Perioperative Period"[Mesh] OR "Perioperative Care"[Mesh] OR “perioperative”[tiab]) | [207696](http://www.ncbi.nlm.nih.gov/pubmed/?cmd=HistorySearch&querykey=3) |
| [#4](http://www.ncbi.nlm.nih.gov/pubmed/advanced) | Search (#1 AND #2 AND #3) | [697](http://www.ncbi.nlm.nih.gov/pubmed/?cmd=HistorySearch&querykey=4) |
| [#5](http://www.ncbi.nlm.nih.gov/pubmed/advanced) | Search ("Neoplasms"[Mesh] OR “Cancer”[tiab] OR "Infection"[Mesh]) | [3321829](http://www.ncbi.nlm.nih.gov/pubmed/?cmd=HistorySearch&querykey=5) |
| [#6](http://www.ncbi.nlm.nih.gov/pubmed/advanced) | Search (#1 AND #2 AND #5) | [4165](http://www.ncbi.nlm.nih.gov/pubmed/?cmd=HistorySearch&querykey=6) |
| [#7](http://www.ncbi.nlm.nih.gov/pubmed/advanced) | Search (#4 OR #6) | [4725](http://www.ncbi.nlm.nih.gov/pubmed/?cmd=HistorySearch&querykey=7) |
| [#8](http://www.ncbi.nlm.nih.gov/pubmed/advanced) | Search "Humans"[Mesh] | [13172648](http://www.ncbi.nlm.nih.gov/pubmed/?cmd=HistorySearch&querykey=8) |
| [#9](http://www.ncbi.nlm.nih.gov/pubmed/advanced) | Search (#7 AND #8) | [4380](http://www.ncbi.nlm.nih.gov/pubmed/?cmd=HistorySearch&querykey=9) |
| [#10](http://www.ncbi.nlm.nih.gov/pubmed/advanced) | Search "Meta-Analysis" [Publication Type] OR "Meta-Analysis as Topic"[Mesh] OR "Meta-Analysis"[tiab] OR "systematic review" OR "Cohort Studies"[Mesh]) OR "Randomized Controlled Trial"[Publication Type] OR "Randomized Controlled Trials as Topic"[MeSH] OR "Single-Blind Method"[MeSH] OR "Double-Blind Method"[MeSH] OR "Random Allocation"[MeSH] | [1809614](http://www.ncbi.nlm.nih.gov/pubmed/?cmd=HistorySearch&querykey=10) |
| [#11](http://www.ncbi.nlm.nih.gov/pubmed/advanced) | Search (#9 AND #10) | [1006](http://www.ncbi.nlm.nih.gov/pubmed/?cmd=HistorySearch&querykey=11) |
| [#12](http://www.ncbi.nlm.nih.gov/pubmed/advanced) | Search (("Adult"[Mesh]) AND #11) | [711](http://www.ncbi.nlm.nih.gov/pubmed/?cmd=HistorySearch&querykey=12) |
| [#13](http://www.ncbi.nlm.nih.gov/pubmed/advanced) | Search (#12) AND ("2012/09/01"[Date - Entrez] : "3000"[Date - Entrez]) | [37](http://www.ncbi.nlm.nih.gov/pubmed/?cmd=HistorySearch&querykey=13) |
| [#14](http://www.ncbi.nlm.nih.gov/pubmed/advanced) | Search (#12) AND ("1994/01/01"[Date - Entrez] : "2002/12/31"[Date - Entrez]) | [154](http://www.ncbi.nlm.nih.gov/pubmed/?cmd=HistorySearch&querykey=14) |
| [#15](http://www.ncbi.nlm.nih.gov/pubmed/advanced) | Search (#13 OR #14) | [191](http://www.ncbi.nlm.nih.gov/pubmed/?cmd=HistorySearch&querykey=15) |

Cochrane Library 16.04.2014

Search Name: anemia update

Date Run: 16/04/14 12:30:17.198

Description:

| ID | Search | Hits |
| --- | --- | --- |
| #1 | Anemia | 7982 |
| #2 | Vitamin B 12 or Folic Acid or Iron or Erythropoietin or Blood Transfusion | 16962 |
| #3 | Perioperative | 7390 |
| #4 | [mh "Perioperative Care"] | 10256 |
| #5 | [mh "Perioperative Period"] | 5692 |
| #6 | #1 and #2 and (#3 or #4 or #5) | 121 |
| #7 | cancer | 77410 |
| #8 | infection | 55568 |
| #9 | #1 and #2 and (#7 or #8) | 1210 |
| #10 | #6 or #9 | 1269 |
| #11 | human | 567620 |
| #12 | adult or adults | 329709 |
| #13 | #10 and #11 and #12 | 665 |
| #14 | #13 Publication Date from 2012 to 2014 | 196 |
| #15 | #13 Publication Date from 1994 to 2002 | 112 |
| #16 | #14 or #15 | 308 |

Web of Science (via UNC) 16.04.2014

| 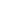 # 14 | 96 | #13 OR #12  Timespan=All years  Search language=English |
| --- | --- | --- |
| 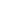 # 13 | 49 | #10 AND #9  **Refined by:** **PUBLICATION YEARS:** ( 2000 OR 2002 OR 1995 OR 1997 OR 2001 OR 1998 OR 1996 OR 1999 OR 1994 )  Timespan=All years  Search language=Auto |
| 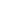 # 12 | 47 | #10 AND #9  **Refined by:** **PUBLICATION YEARS:** ( 2012 OR 2013 OR 2014 )  Timespan=All years  Search language=Auto |
| # 1 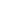 | 1,111 | **TOPIC:** (anemia) *AND* **TOPIC:** (perioperative)  Timespan=All years  Search language=English |
| # 2 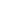 | 271 | **TOPIC:** (anemia) *AND* **TOPIC:** (perioperative) *AND* **TOPIC:** (human*) *AND* **TOPIC:** (adult*)  Timespan=All years  Search language=English |
| # 3 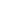 | 257 | **TOPIC:** (anemia) *AND* **TOPIC:** (perioperative) *AND* **TOPIC:** (human*) *AND* **TOPIC:** (adult*)  **Refined by:** **DOCUMENT TYPES:** ( ARTICLE OR REVIEW OR CLINICAL TRIAL )  Timespan=All years  Search language=Auto |
| # 4 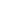 | Approximately  14,767 | **TOPIC:** (anemia) *AND* **TOPIC:** (cancer OR infection) *AND* **TOPIC:** (human*) *AND* **TOPIC:** (adult*)  Timespan=All years  Search language=English |
| # 5 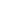 | Approximately  12,695 | **TOPIC:** (anemia) *AND* **TOPIC:** (cancer OR infection) *AND* **TOPIC:** (human*) *AND* **TOPIC:** (adult*)  **Refined by:** **DOCUMENT TYPES:** ( ARTICLE OR REVIEW OR CLINICAL TRIAL )  Timespan=All years  Search language=Auto |
| # 6 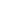 | Approximately  1,755,957 | **TOPIC:** (Blood Transfusion) *OR* **TOPIC:** (Erythropoietin) *OR* **TOPIC:** (iron) *OR* **TOPIC:** (folic acid) *AND* **TOPIC:** (vitamin b 12)  Timespan=All years  Search language=English |
| # 7 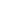 | Approximately  2,726 | #6 AND #5  Timespan=All years  Search language=English |
| # 8 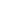 | Approximately  181 | #6 AND #3  Timespan=All years  Search language=English |
| # 9 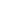 | Approximately  2,863 | #8 OR #7  Timespan=All years  Search language=English |
| # 10 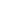 | Approximately  1,960,689 | **TOPIC:** (meta-analysis) *OR* **TOPIC:** (systematic review) *OR* **TOPIC:** (cohort study) *OR* **TOPIC:** (randomized controlled trial)  Timespan=All years  Search language=English |
| # 11 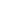 | 278 | #10 AND #9  Timespan=All years  Search language=English |

CINAHL 16.04.2014

| **#** | **Query** | **Results** |
| --- | --- | --- |
| S1 | (MH "Anemia+") | 9,811 |
| S2 | (MH "Perioperative Care+") OR "perioperative" | 37,481 |
| S3 | (MH "Vitamin B12") OR (MH "Folic Acid") OR (MH "Iron") OR (MH "Erythropoietin") OR (MH "Blood Transfusion") | 13,954 |
| S4 | S1 AND S2 AND S3 | 76 |
| S5 | (MH "Neoplasms") OR (MH "Infection") | 36,965 |
| S6 | S1 AND S3 AND S5 | 235 |
| S7 | S4 OR S6 | 307 |
| S8 | (MH "Adult") | 433,43 |
| S9 | (MH "Human") | 828,133 |
| S10 | S7 AND S8 AND S9 | 28 |
| S11 | S10 Limiters - Published Date: 20120901-20141231 | 2 |
| S12 | S10 Limiters - Published Date: 19940101-20021231 | 3 |
| S13 | S11 OR S12 | 5 |

EMBASE 16.04.2014

| **No.** | **Query** | **Results** |
| --- | --- | --- |
| **#1** | **'anemia'**/exp AND **'perioperative period'**/exp AND (**'cyanocobalamin'**/exp OR **'folic acid'**/exp OR **'iron'**/exp OR **'erythropoietin'**/exp OR **'blood transfusion'**/exp) AND **'adult'**/exp AND **'human'**/exp | **124** |
| **#2** | **'anemia'**/exp AND (**'cyanocobalamin'**/exp OR **'folic acid'**/exp OR **'iron'**/exp OR **'erythropoietin'**/exp OR **'blood transfusion'**/exp) AND (**'neoplasm'**/exp OR **'infection'**/exp) AND **'adult'**/exp AND **'human'**/exp | **6484** |
| **#3** | **#1** OR **#2** | **6551** |
| **#4** | **#3** AND (**'clinical article'**/exp OR **'clinical trial'**/exp OR **'cohort analysis'**/exp OR **'comparative study'**/exp OR **'controlled clinical trial'**/exp OR **'controlled study'**/exp OR **'double blind procedure'**/exp OR **'human'**/exp OR **'major clinical study'**/exp OR **'multicenter study'**/exp OR **'phase 1 clinical trial'**/exp OR **'phase 2 clinical trial'**/exp OR **'phase 3 clinical trial'**/exp OR **'randomized controlled trial'**/exp) AND (**'article'**/it OR **'review'**/it) | **5569** |
| **#5** | **'anemia'**/mj | **32548** |
| **#6** | **#4** AND **#5** | **823** |
| **#7** | **#6** AND [2012-2014]/py | **92** |
| **#8** | **#6** AND [1994-2002]/py | **196** |
| **#9** | **#7** OR **#8** | **288** |
